# Supplementary material
Source: HighWire-hosted journal article supplement (https://www.jneurosci.org/highwire/filestream/599808/field_highwire_adjunct_files/1/fig_1.pdf)

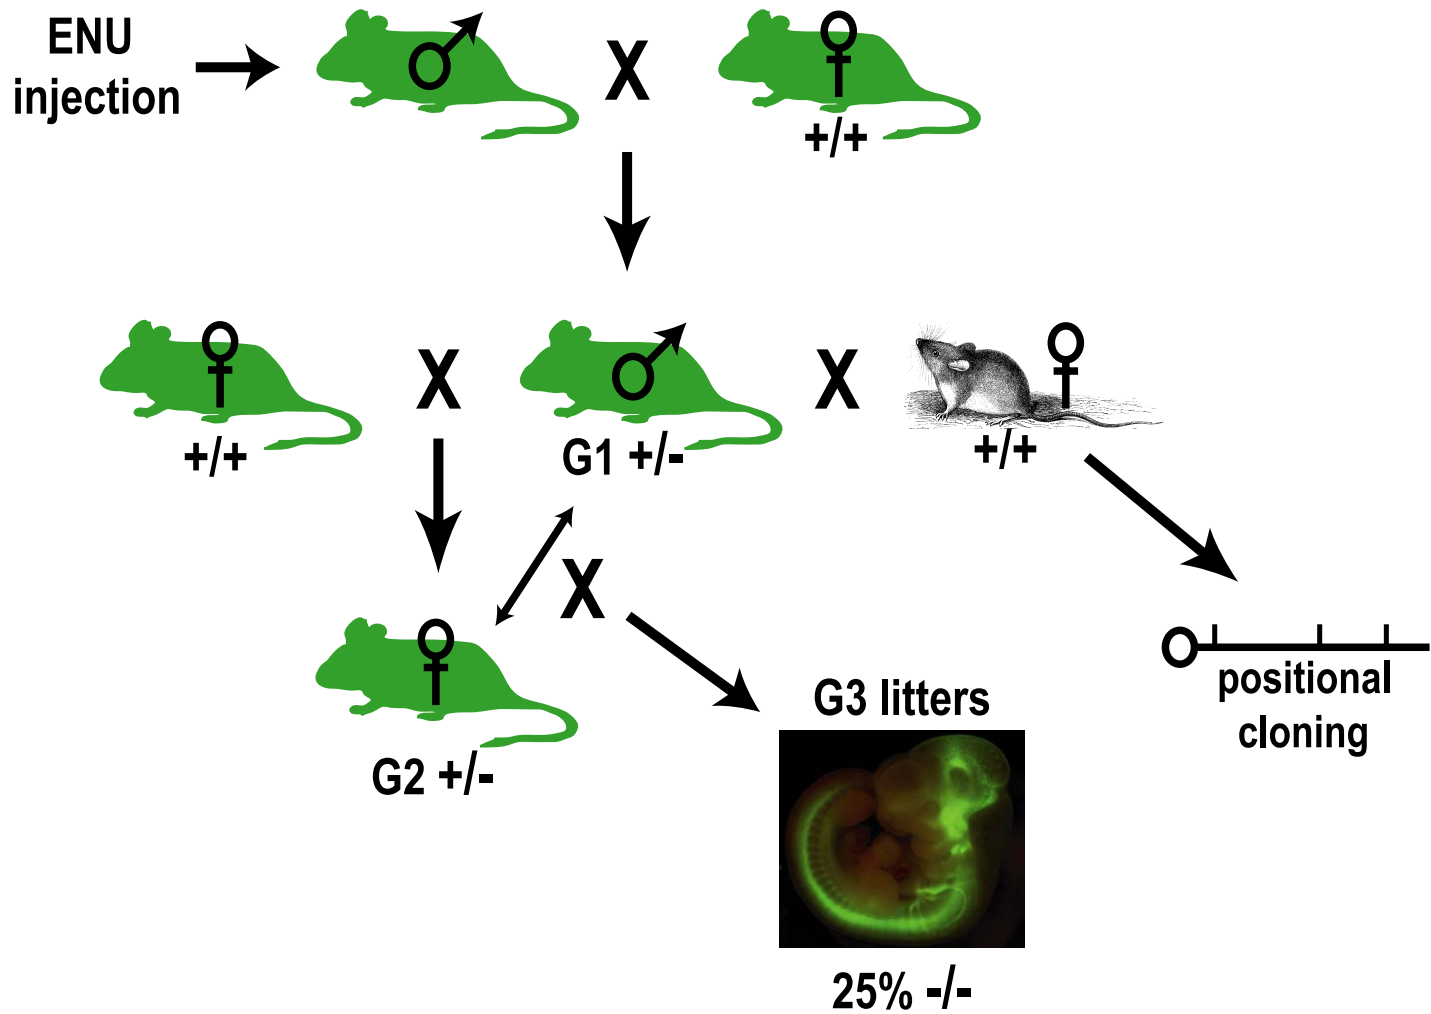

Supplement: fig_1.pdf [file fig_1.pdf]
